# Supplementary material for: Genetic diversity of Microsporidia in the circulatory system of endemic amphipods from different locations and depths of ancient Lake Baikal
Source: PeerJ. 2018 Aug 2;6:e5329. doi: 10.7717/peerj.5329 (PMC6076988; doi:10.7717/peerj.5329)
Supplement: Table S1 [file peerj-06-5329-s001.xlsx]

## Sheet: All analyzed samples
Host species	Depths of sampling, m	Number of individuals per pool	Location of sampling	Coordinates	Date of sampling	Total number of pooled haemolymph samples	Number of identified microsporidia	% of infected pools (if number of samples > 4)	Approx. total number of individuals
Eulimnogammarus cyaneusBaz., 1945	0-1	~50	Listvyanka	N: 51°87.018; E: 104°80.931	14 Oct 2011	1	1	-	~50
			Bolshie Koty	N: 53°56.009; E: 108°16.466	07 Oct 2011	1	1	-	~50
				N: 51°87.018; E: 104°80.931	25 Oct 2011	1	1	-	~50
Acanthogammarus victorii maculosusDor., 1930	54-60	2	Kharantsy Island	N: 53°14.897; E 107°22.950	Jun 2014	2	1	-	~4
Eulimnogammarus verrucosus(Gerstf., 1858)	0-1	3-4	Listvyanka	N: 51°87.018; E: 104°80.931	11 Dec 2013	18	5	27.7778	~60
					24 Jan 2014	6	2	33.3333	~20
					Aug 2016	33	1	3.0303	~120
			Bolshie Koty	N: 53°56.009; E: 108°16.466	Sep 2016	33	1	3.0303	~120
					07 Oct 2011	8	1	12.5	~30
					Oct 2015	25	0	0	~90
			Port Baikal	N: 51°52'14.65"; E: 104°48'42.47"	10 Jun 2016	33	3	9.09091	~120
			Burkhan Cape	N: 53°12'12.88"; E: 107°20'37.80"	19 Jun 2016	14	1	7.14286	~50
Pallasea cancellus (Pallas, 1776)	0-1	2-3	Listvyanka	N: 51°87.018; E: 104°80.931	Feb 2014	20	6	30	~50
Acanthogammarus lappaceus longispinusTacht., 2000	25-35	1	Ushkany Islands	N: 53° 51.12; E: 108°35.49	Jun 2014	5	1	20	5
			Olkhon Gate	N: 53°00.637; E: 106°55.250	19 Jun 2016	19	2	10.5263	19
Eulimnogammarus maritujiBaz., 1945	0-1	3-4	Listvyanka	N: 51°87.018; E: 104°80.931	05 May 2016	5	1	20	~18
			Bolshie Koty	N: 53°56.009; E: 108°16.466	Jun 2014	5	1	20	~18
Eulimnogammarus vitatus(Dyb., 1874)	0-1	3-4	Bolshie Koty	N: 53°56.009; E: 108°16.466	May 2014	10	0	0	~35
Eulimnogammarus maakii maackii (Gerstf., 1858)	0-1	3-4	Listvyanka	N: 51°87.018; E: 104°80.931	Jun 2014	2	0	-	~7
Acanthogammarus flavus flavus(Dyb., 1874)	32-33	2	Cape Umysh-Tame	N: 53°00.637; E: 106°55.250	Jun 2014	2	0	-	~5
Carinurus belkini(Garj., 1901)	146-150	2	Peschanka Bay	N:53°19.379; E 107°26.371	Jun 2014	1	0	-	2
Garjajewia cabanisii cabanisii (Dyb., 1874)	146-150	2	Peschanka Bay	N:53°19.379; E 107°26.371	Jun 2014	1	0	-	2
Acanthogammarus godlewskii godlewskii(Dyb., 1874)	146-150	2	Peschanka Bay	N:53°19.379; E 107°26.371	Jun 2014	1	0	-	2
Propachygammarus maximus(Garj., 1901)	76-78	1	Ushkany Islands	N: 53°50.902; E: 108°40.513	Jun 2014	2	0	-	2
Acanthogammarus brevispinusDor., 1922	11-35	3-4	Opposite the flow Kharauz	N: 52°17.642; E: 106°10.285	Jun 2014	4	0	-	~15
		2-3	Olkhon Gate	N: 53°00.637; E: 106°55.250	19 Jun 2016	2	0	-	~5
Acanthogammarus reicherii(Dyb., 1874)	46-49	1	Opposite the flow Kharauz	N: 52°17.642; E: 106°10.285	Jun 2014	1	0	-	1
Ommatogammarus carneolus melanophthalmus Dor. in: Baz., 1945	200	10-15	Bolshie Koty	N: 53°56.009; E: 108°16.466	12 Mar 2016	2	0	-	~25
Parapallasea lagovskii(Dyb., 1874)	25-35	1	Bolshie Koty	N: 53°56.009; E: 108°16.466	20 Mar 2016	2	0	-	2
Eulimnogammarus viridis olivaceus(Dyb., 1874)	0-1	10	Kotelnikovskiy Cap	N: 55°04'0.12"; E: 109°06'24.2"	19 Mar 2016	1	0	-	10
Parapallasea puzyllii puzyllii(Dyb., 1874)	25-35	1	Olkhon Gate	N: 53°00.637; E: 106°55.250	19 Jun 2016	1	0	-	1
Pallasea brandtia brandtia(Dyb., 1874)	25-35	3-4	Olkhon Gate	N: 53°00.637; E: 106°55.250	19 Jun 2016	4	0	-	~15
Pallasea kesslerii(Dyb., 1874)	25-35	1	Olkhon Gate	N: 53°00.637; E: 106°55.250	19 Jun 2016	1	0	-	1
Pallasea grubii grubii (Dyb., 1874)	25-35	3-4	Olkhon Gate	N: 53°00.637; E: 106°55.250	19 Jun 2016	2	0	-	~7
