# Supplementary material for: Genetic diversity of Microsporidia in the circulatory system of endemic amphipods from different locations and depths of ancient Lake Baikal
Source: PeerJ. 2018 Aug 2;6:e5329. doi: 10.7717/peerj.5329 (PMC6076988; doi:10.7717/peerj.5329)
Supplement: Table S2 — It contains sequences obtained both in the current study and in Madyarova et al. (2015). Columns A-H describe samples obtained in our work, while columns H–M describe their closest their closest hits in the NCBI database. E-values equal to 0 represent values lower than 10−200. [file peerj-06-5329-s002.xlsx]

## Sheet: All identified microsporidia
GenBank ID	ID	Host species	Location of sampling	Coordinates	Sampling date	Reference	Best BLAST hit ID	Description	Score	Query cover	E value	Identity
KT956053	B.Koty-2	Eulimnogammarus cyaneus	Bolshie Koty	N: 53°56.009; E: 108°16.466	07 Oct 2011	This paper	MG063425.1	Cucumispora sp. isolate KKBl5	1567	0.99	0	0.99
KT956054	Listv-3		Listvyanka	N: 51°87.018; E: 104°80.931	14 Oct 2011		MG063425.1	Cucumispora sp. isolate KKBl5	1555	0.95	0	0.99
KR080135	Listv-1				25 Oct 2011		MG063425.1	Cucumispora sp. isolate KKBl5	1585	0.96	0	0.99
KT956063	Khar-1	Acanthogammarus victorii maculosus	Kharantsy Island	N: 53°14.897; E 107°22.950	Jun 2014		MG063425.1	Cucumispora sp. isolate KKBl5	1496	0.97	0	0.98
KT956057	Listv-9	Eulimnogammarus verrucosus	Listvyanka	N: 51°87.018; E: 104°80.931	11 Dec 2013		MF399469.1	Dictyocoela sp. isolate SIP9	1469	0.99	0	0.97
KT956065	Listv-16						MG027873.1	Dictyocoela sp. clone SIP9_clone4	1101	1	0	0.99
KT956064	Listv.ev-14						MG027878.1	Dictyocoela sp. clone SIP10_c2	1245	1	0	0.99
KT956058	Listv-10						JX915760.1	Enterocytospora artemiae isolate Ea_Fang6	915	0.87	0	0.87
KT956059	Listv.ev-11						HM991452.1	Microsporidium sp. GPM2 16S	1240	0.97	0	0.94
KM977840	Listv-28				24 Jan 2014	(Madyarova et al., 2015)	KX379715.1	Nosema sp. LS10M3	1245	1	0	0.99
KM977841	Listv-31						KX379715.1	Nosema sp. LS10M3	1310	1	0	0.99
KY458983	Listv-170				Aug 2016	This paper	FJ756111.1	Microsporidium sp. BPAR11 PAR	854	0.84	0	0.91
KY458982	B.Koty-128		Bolshie Koty	N: 53°56.009; E: 108°16.466	Sep 2016		FJ756111.1	Microsporidium sp. BPAR11 PAR	891	0.92	0	0.92
KT956056	B.Koty-4				07 Oct 2011		FJ756178.1	Microsporidium sp. BVOR1 PAR	1031	0.87	0	0.92
KY458986	P.Baik-63		Port Baikal	N: 51°52'14.65"; E: 104°48'42.47"	10 Jun 2016		FJ820198.1	Uncultured Microsporidia clone B1FAS9	1166	0.99	0	0.99
KY458987	P.Baik-87						FJ820198.1	Uncultured Microsporidia clone B1FAS9	1317	0.97	0	1
KY458988	P.Baik-90						FJ820198.1	Uncultured Microsporidia clone B1FAS9	1358	0.98	0	0.99
KY458989	Burkh.C-105		Burkhan Cape	N: 53°12'12.88"; E: 107°20'37.80"	19 Jun 2016		FJ820198.1	Uncultured Microsporidia clone B1FAS9	1057	0.91	0	0.98
KT956060	Listv.pc-14	Pallasea cancellus	Listvyanka	N: 51°87.018; E: 104°80.931	Feb 2014		MG027878.1	Dictyocoela sp. clone SIP10_c2	1229	1	0	0.95
KM977842	Listv-4					(Madyarova et al., 2015)	FJ755959.1	Microsporidium sp. BALB1 CAB	1467	1	0	0.99
KM977843	Listv-7a						FJ755959.1	Microsporidium sp. BALB1 CAB	1434	1	0	0.99
KM977844	Listv.pc-11						FJ755959.1	Microsporidium sp. BALB1 CAB	1506	1	0	1
KM977845	Listv-12						FJ755959.1	Microsporidium sp. BALB1 CAB	1247	0.99	0	0.99
KM977846	Listv-16						FJ756113.1	Microsporidium sp. BPAR12 PAR2	1411	1	0	1
KM977839	Ushkan-5	Acanthogammarus lappaceus longispinus	Ushkany Islands	N: 53° 51.12; E: 108° 35.49	Jun 2014		MG027893.1	Dictyocoela sp. clone UB11_C9	1297	1	0	0.99
KY458984	Olkh.G-22		Olkhon Gate	N: 53°00.637; E: 106°55.250	19 Jun 2016	This paper	MF399469.1	Dictyocoela sp. isolate SIP9	1456	0.99	0	0.98
KY458985	Olkh.G-24						MF399469.1	Dictyocoela sp. isolate SIP9	1530	1	0	0.99
KY458981	Listv-22	Eulimnogammarus marituji	Listvyanka	N: 51°87.018; E: 104°80.931	05 May 2016		MG027888.1	Dictyocoela sp. clone UB11_C4	1362	0.98	0	0.99
KP027301	B.Koty-17		Bolshie Koty	N: 53°56.009; E: 108°16.466	Jun 2014	(Madyarova et al., 2015)	FJ756205.1	Dictyocoela sp. BLAP PAR4	1330	1	0	0.99
